# Supplementary material for: The Effect of Autogenic Training in a Form of Audio Recording on Sleep Quality and Physiological Stress Reactions of University Athletes—Pilot Study
Source: MDPI journal article supplement (doi:10.3390/ijerph192316043), 2022-11-30
Supplement: s1 [file s1]

**Table S1.** Comparison of PRE and POST measurements among EG and CG and between the groups.

| Data Source              | Parameter                  | EG ( <i>n</i> =11) |        |                       |          | CG ( <i>n</i> =11) |        |                       |          | EG/CG Diff |          |                       |          |
|--------------------------|----------------------------|--------------------|--------|-----------------------|----------|--------------------|--------|-----------------------|----------|------------|----------|-----------------------|----------|
|                          |                            | Median             |        | Pre-Post diff         |          | Median             |        | Pre-Post diff         |          | Pre-Pre    |          | Post-Post             |          |
|                          |                            | PRE                | POST   | <i>Z</i> <sup>b</sup> | <i>p</i> | PRE                | POST   | <i>Z</i> <sup>b</sup> | <i>p</i> | <i>Z</i>   | <i>p</i> | <i>Z</i> <sup>c</sup> | <i>p</i> |
| Questionnaire            | PSQI                       | 6.00               | 5.00   | 2.52                  | 0.011    | 6.00               | 5.00   | 1.63                  | 0.103    | -0.07      | 0.945    | -0.97                 | 0.330    |
| Actigraphy               | Sleep duration (min.)      | 428.00             | 402.50 | 0.53                  | 0.594    | 394.00             | 399.17 | 0.66                  | 0.508    | 0.45       | 0.653    | 0.37                  | 0.713    |
| ADS application          | Sleep duration (min.)      | 498.50             | 532.75 | 2.13                  | 0.033    | 509.75             | 481.50 | 0.89                  | 0.374    | -0.66      | 0.511    | -1.08                 | 0.279    |
|                          | Sleep latency (min.)       | 15.63              | 13.75  | 0.54                  | 0.593    | 11.75              | 11.25  | 0.49                  | 0.624    | -0.36      | 0.718    | -0.79                 | 0.429    |
|                          | Sleep quality <sup>a</sup> | 3.50               | 3.25   | 0.10                  | 0.918    | 3.75               | 3.75   | 0.51                  | 0.609    | -0.10      | 0.920    | -0.74                 | 0.462    |
|                          | Energy level <sup>a</sup>  | 3.50               | 3.25   | 0.43                  | 0.666    | 3.00               | 3.25   | 1.13                  | 0.261    | -0.89      | 0.372    | -0.34                 | 0.738    |
|                          | Stress level <sup>a</sup>  | 1.75               | 1.00   | 1.15                  | 0.251    | 1.25               | 1.50   | 0.71                  | 0.481    | -1.77      | 0.077    | -0.38                 | 0.707    |
| SC sensor <sup>d</sup>   | Baseline                   | 2.13               | 1.87   | 0.62                  | 0.533    | 3.39               | 2.94   | 0.53                  | 0.594    | -0.72      | 0.470    | -0.98                 | 0.325    |
|                          | Event                      | 5.67               | 3.81   | 1.60                  | 0.110    | 7.91               | 6.45   | 0.09                  | 0.929    | -0.53      | 0.599    | -1.18                 | 0.237    |
|                          | Post-event                 | 4.53               | 3.04   | 1.87                  | 0.062    | 6.63               | 5.58   | 0.44                  | 0.657    | -0.85      | 0.393    | -0.98                 | 0.325    |
| Temp sensor <sup>d</sup> | Baseline                   | 33.48              | 32.65  | 0.53                  | 0.594    | 31.92              | 33.90  | 0.09                  | 0.929    | -0.07      | 0.948    | 0.30                  | 0.768    |
|                          | Event                      | 33.93              | 34.33  | 0.56                  | 0.575    | 31.70              | 33.64  | 0.04                  | 0.965    | 0.26       | 0.793    | 0.53                  | 0.599    |
|                          | Post-event                 | 34.47              | 34.80  | 1.11                  | 0.266    | 31.63              | 34.05  | 0.80                  | 0.424    | 0.79       | 0.431    | 0.20                  | 0.844    |
| BVP sensor <sup>d</sup>  | Baseline                   | 36.50              | 36.51  | 0.27                  | 0.655    | 36.47              | 36.48  | 0.31                  | 0.755    | 0.69       | 0.491    | 1.08                  | 0.279    |
|                          | Event                      | 36.36              | 36.39  | 0.46                  | 0.646    | 36.38              | 36.39  | 0.36                  | 0.655    | 0.13       | 0.896    | 0.69                  | 0.491    |
|                          | Post-event                 | 36.39              | 36.38  | 0.67                  | 0.562    | 36.40              | 36.36  | 1.27                  | 0.238    | -0.39      | 0.694    | 1.15                  | 0.251    |
| HR sensor <sup>d</sup>   | Baseline                   | 63.23              | 68.52  | 1.60                  | 0.110    | 69.53              | 73.67  | 2.04                  | 0.041    | -0.66      | 0.511    | -1.25                 | 0.212    |
|                          | Event                      | 73.03              | 74.32  | 1.33                  | 0.182    | 77.78              | 77.79  | 0.89                  | 0.374    | -0.85      | 0.393    | -0.98                 | 0.325    |
|                          | Post-event                 | 61.94              | 66.86  | 1.60                  | 0.110    | 69.20              | 70.44  | 0.71                  | 0.477    | -1.05      | 0.293    | -0.66                 | 0.511    |
| Resp sensor <sup>d</sup> | Baseline                   | 14.64              | 14.32  | 0.36                  | 0.722    | 13.82              | 13.58  | 0.62                  | 0.534    | 0.20       | 0.844    | 0.20                  | 0.844    |
|                          | Event                      | 13.55              | 13.41  | 0.27                  | 0.790    | 13.20              | 13.15  | 1.16                  | 0.266    | 0.39       | 0.694    | 0.79                  | 0.431    |
|                          | Post-event                 | 14.67              | 14.80  | 0.22                  | 0.824    | 13.30              | 12.89  | 1.42                  | 0.155    | 0.13       | 0.896    | 0.72                  | 0.470    |

Note: <sup>a</sup> subjective evaluation on a Likert scale from 1 to 5; <sup>b</sup> results of Wilcoxon test; <sup>c</sup> results of Mann-Whitney U test; <sup>d</sup> Measurements taken with the biofeedback device containing three 5-minutes' stages: baseline (anticipation of stress), event (arithmetic task-induced stress) and post-event (post-activity rest).

**Table S2.** Mean and standard deviation values for PRE and POST measurements among EG and CG.

| Data Source              | Parameter                  | EG ( <i>n</i> = 11) |             |                |             | CG ( <i>n</i> = 11) |              |                |             |
|--------------------------|----------------------------|---------------------|-------------|----------------|-------------|---------------------|--------------|----------------|-------------|
|                          |                            | PRE                 |             | POST           |             | PRE                 |              | POST           |             |
|                          |                            | M ± SD              | Range       | M ± SD         | Range       | M ± SD              | Range        | M ± SD         | Range       |
| Questionnaire            | PSQI                       | 6.27 ± 1.19         | 5–8         | 4.64 ± 1.57    | 2–8         | 6.27 ± 1.01         | 5–8          | 5.27 ± 1.74    | 3–8         |
| Actigraphy               | Sleep duration (min.)      | 395.17 ± 78.92      | 250–473     | 403.7 ± 48.2   | 313–467     | 393.7 ± 57.31       | 292–477      | 383.02 ± 75.16 | 217–489     |
| ADS application          | Sleep duration (min.)      | 478.09 ± 65.18      | 370–566     | 516.82 ± 78.06 | 421–688     | 493.7 ± 79.06       | 324–594      | 468.07 ± 95.63 | 218–596     |
|                          | Sleep latency (min.)       | 17.74 ± 9.7         | 4–34        | 18.21 ± 11.32  | 7–40        | 17.0 ± 10.98        | 8–40         | 15.23 ± 10.05  | 3–36        |
|                          | Sleep quality <sup>a</sup> | 3.57 ± 0.32         | 3.0–4.0     | 3.55 ± 0.46    | 3.0–4.25    | 3.61 ± 0.62         | 2.75–4.75    | 3.66 ± 0.64    | 2.25–4.75   |
|                          | Energy level <sup>a</sup>  | 3.23 ± 0.69         | 2.0–4.25    | 3.3 ± 0.53     | 2.5–4.0     | 3.04 ± 0.87         | 2.0–5.0      | 3.26 ± 0.85    | 1.25–4.5    |
|                          | Stress level <sup>a</sup>  | 1.9 ± 0.72          | 1.0–3.25    | 1.59 ± 0.81    | 1.0–3.25    | 1.36 ± 0.36         | 1.0–2.0      | 1.5 ± 0.47     | 1.0–2.5     |
| SC sensor <sup>b</sup>   | Baseline                   | 2.18 ± 0.99         | 1.05–4.09   | 2.04 ± 1.33    | 0.41–4.98   | 2.97 ± 1.86         | 0.41–5.62    | 3.35 ± 2.57    | 0.50–9.48   |
|                          | Event                      | 6.08 ± 2.79         | 2.63–11.22  | 4.77 ± 2.7     | 1.29–9.85   | 7.21 ± 4.24         | 1.59–14.19   | 7.19 ± 4.53    | 1.52–14.6   |
|                          | Post-event                 | 5.26 ± 2.94         | 1.96–10.41  | 4.06 ± 2.78    | 0.97–9.44   | 6.7 ± 4.1           | 0.91–13.15   | 6.1 ± 4.11     | 1.19–13.62  |
| Temp sensor <sup>b</sup> | Baseline                   | 31.18 ± 4.27        | 24.30–35.48 | 32.06 ± 3.31   | 24.93–34.83 | 30.99 ± 4.04        | 24.95–34.94  | 31.25 ± 4.85   | 23.10–34.83 |
|                          | Event                      | 32.02 ± 3.72        | 24.89–35.42 | 32.85 ± 3.32   | 25.31–35.18 | 31.25 ± 4.03        | 24.11–35.29  | 31.72 ± 4.66   | 23.05–35.56 |
|                          | Post-event                 | 32.57 ± 3.28        | 25.86–35.47 | 33.1 ± 3.41    | 25.69–35.41 | 31.47 ± 3.68        | 24.14–35.39  | 32.25 ± 4.51   | 23.06–35.72 |
| BVP sensor <sup>b</sup>  | Baseline                   | 36.5 ± 0.05         | 36.40–36.58 | 36.5 ± 0.07    | 36.34–36.57 | 36.49 ± 0.07        | 36.4–36.6    | 36.48 ± 0.04   | 36.44–36.55 |
|                          | Event                      | 36.38 ± 0.07        | 36.23–36.47 | 36.39 ± 0.05   | 36.26–36.45 | 36.36 ± 0.06        | 36.26–36.43  | 36.37 ± 0.06   | 36.26–36.42 |
|                          | Post-event                 | 36.38 ± 0.04        | 36.28–36.43 | 36.4 ± 0.06    | 36.33–36.5  | 36.4 ± 0.05         | 36.33–36.51  | 36.38 ± 0.07   | 36.32–36.57 |
| HR sensor <sup>b</sup>   | Baseline                   | 64.2 ± 11.31        | 43.35–80.68 | 67.17 ± 10.3   | 50.12–82.94 | 67.13 ± 6.9         | 52.66–73.95  | 74.86 ± 13.22  | 51.37–95.94 |
|                          | Event                      | 73.83 ± 13.82       | 49.57–97.1  | 74.13 ± 12.24  | 53.56–91.6  | 79.8 ± 11.45        | 59.24–100.17 | 82.59 ± 13.84  | 64.32–101.6 |
|                          | Post-event                 | 62.84 ± 10.72       | 44.44–81.13 | 65.84 ± 9.75   | 50.28–80.27 | 67.51 ± 8.67        | 52.48–79.05  | 69.68 ± 16.06  | 40.73–90.25 |
| Resp sensor <sup>b</sup> | Baseline                   | 13.34 ± 3.42        | 7.75–18.02  | 13.52 ± 2.92   | 9.44–18.41  | 13.47 ± 2.46        | 9.4–17.59    | 13.68 ± 2.92   | 8.59–18.29  |
|                          | Event                      | 13.75 ± 1.11        | 11.71–15.31 | 13.78 ± 1.09   | 12.62–16.23 | 13.58 ± 1.13        | 12.09–15.49  | 13.34 ± 1.05   | 11.88–15.19 |
|                          | Post-event                 | 14.13 ± 2.78        | 8.75–18.57  | 13.98 ± 2.79   | 8.09–18.19  | 14.06 ± 2.49        | 9.84–17.75   | 13.38 ± 2.47   | 9.70–18.0   |

Note: <sup>a</sup> subjective evaluation on a Likert scale from 1 to 5; <sup>b</sup> Measurements taken with the biofeedback device containing three 5-minutes' stages: baseline (anticipation of stress), event (arithmetic task-induced stress) and post-event (post-activity rest).
